# Supplementary material
Source: Springer Nature journal article supplement (https://www.springermedizin.de/resource/supplementary/12884_2014_1291_MOESM4_ESM.pdf/9458672)
Supplement: MOESM4 [file 9458672]

**Trial Management Committee**

University of Colorado PIs  
Overseas site PIs  
Trial Coordinator  
Data Coordinating Center

**BMGF  
& Scientific  
Advisory  
Committee**

**GN Steering Committee  
& DMC**

**Research Site Specific  
Ethics Review Boards**
